# Supplementary material for: Dose-response of Transcranial Photobiomodulation on Resting-State EEG Dynamics
Source: Research Square preprint supplement (doi:10.21203/rs.3.rs-6679111/v1), 2025-05-26
Supplement: Supplementary file 1 [file 55bc576e3058f881253a0b6d.docx]

**
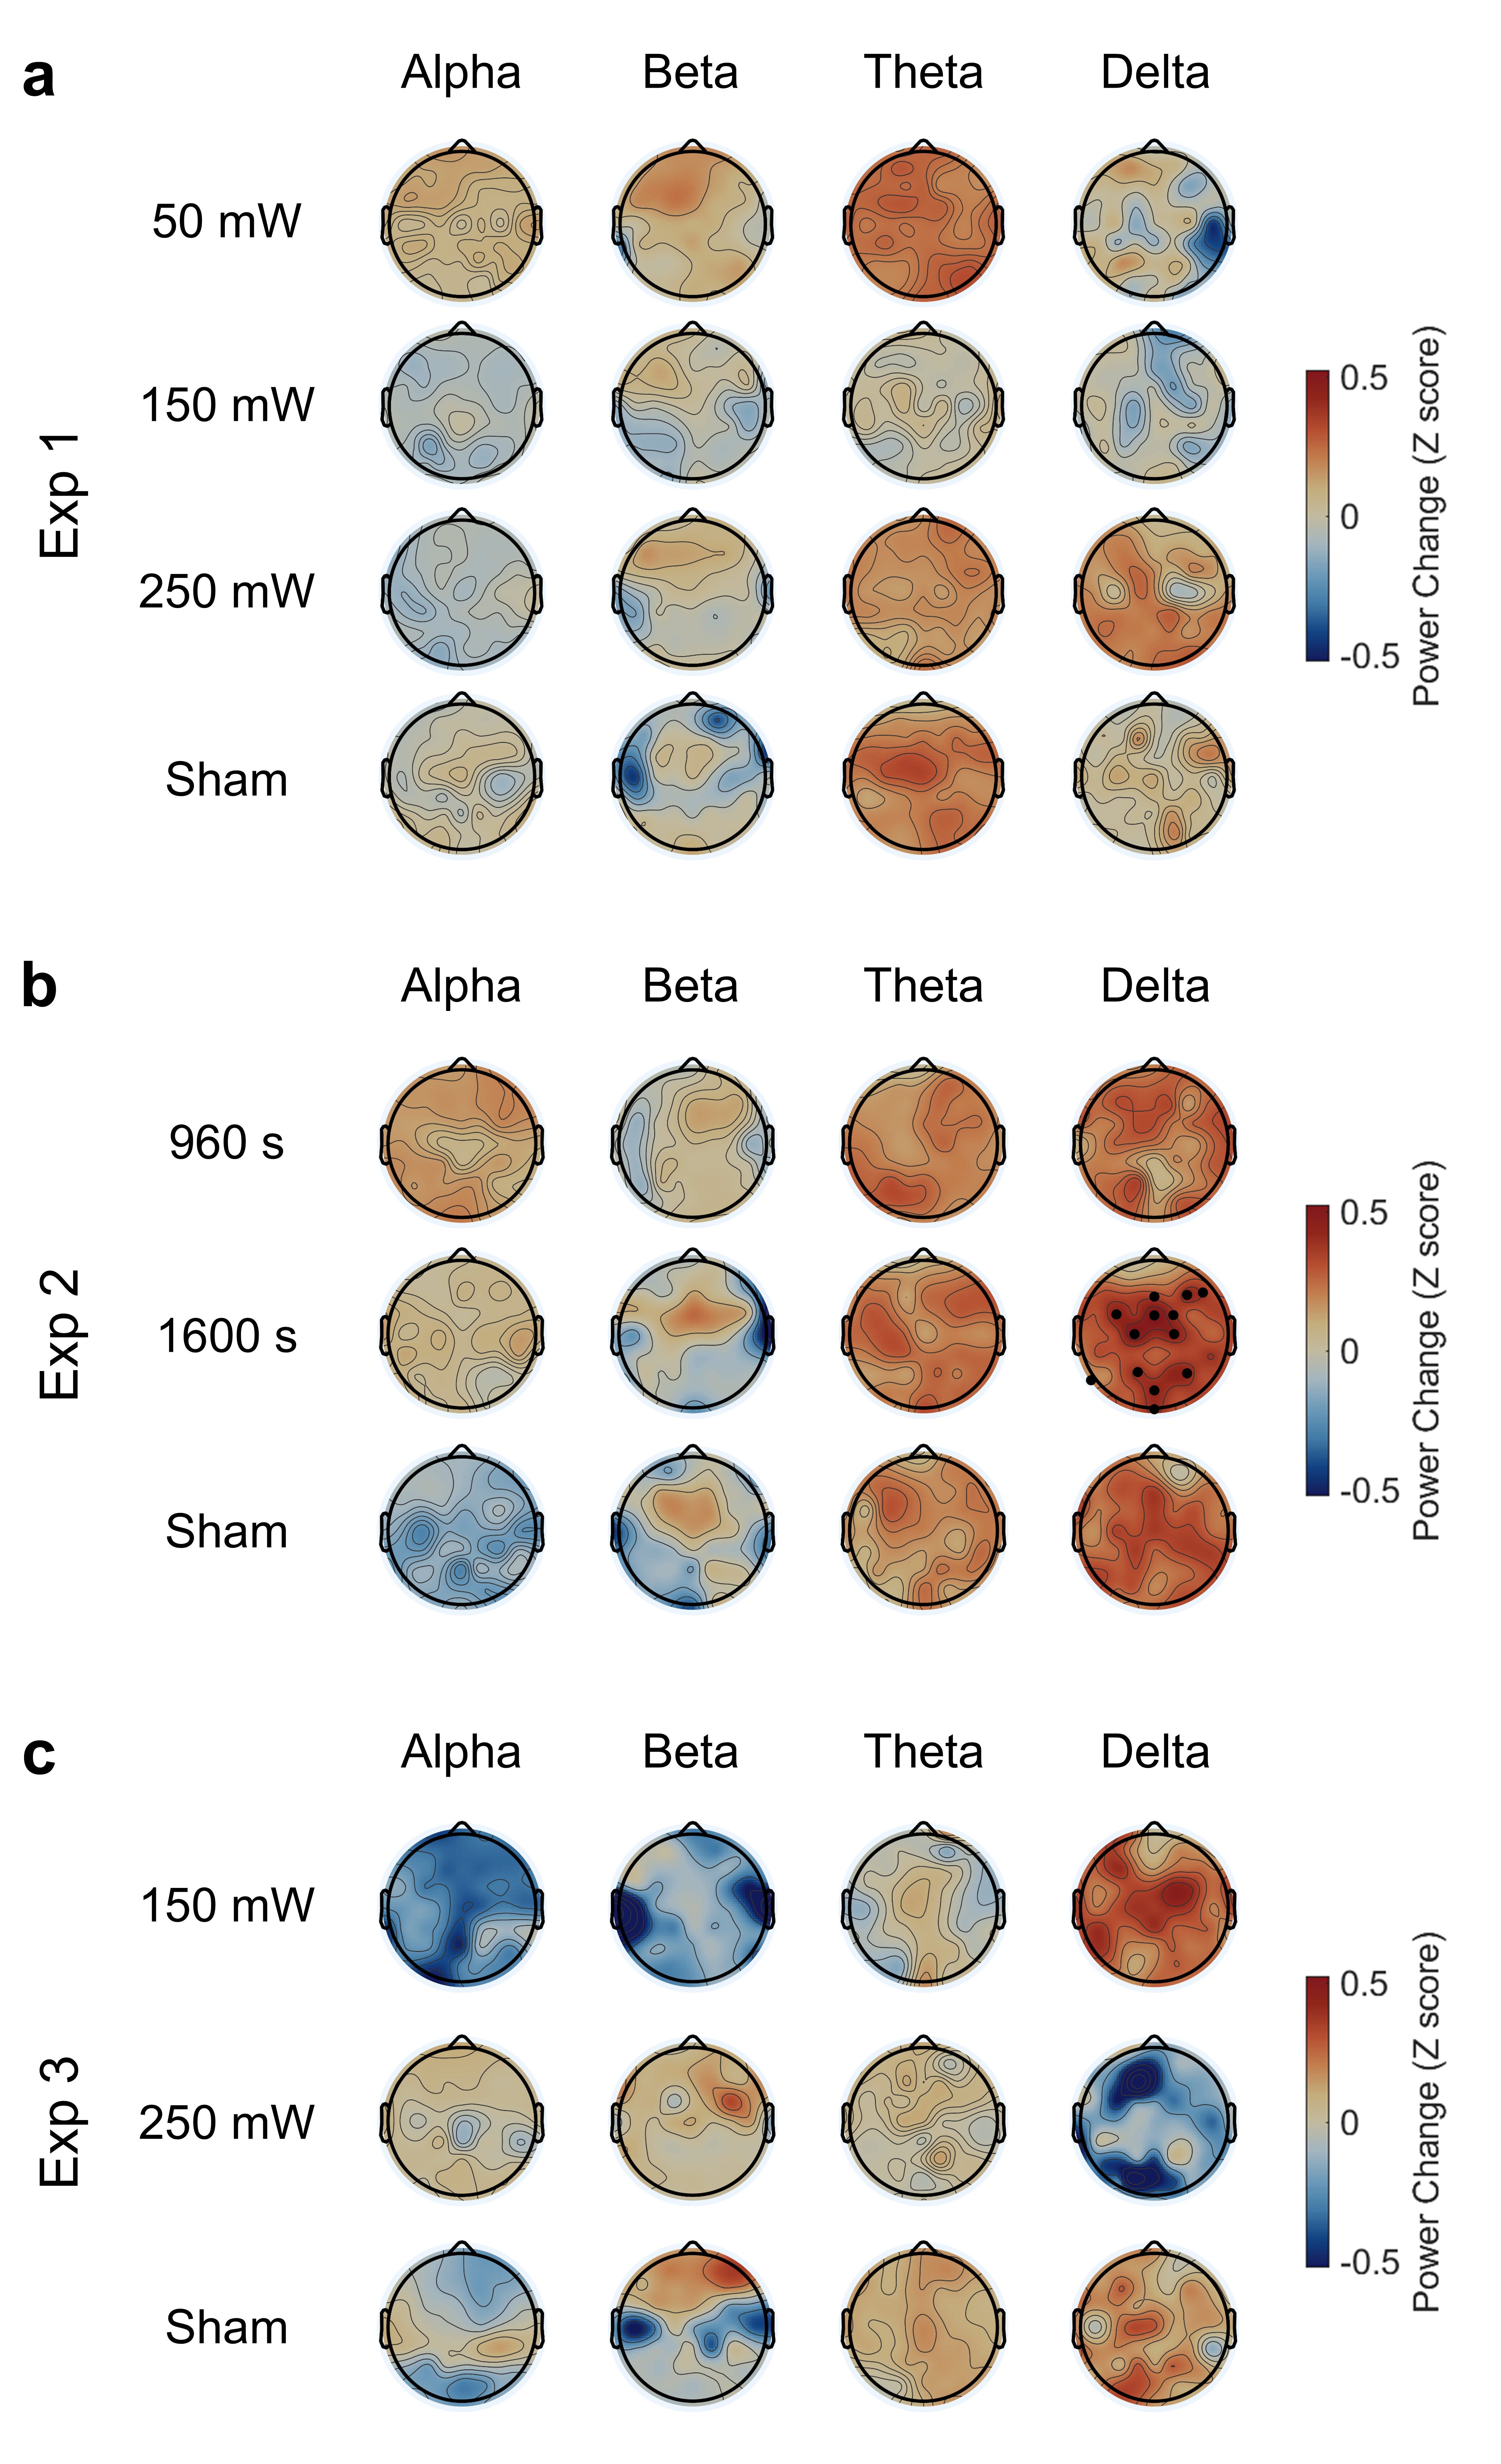
Fig. S1. Topographic map of power changes in three experiments.** A) Topographic maps of powers changes (Δ*Power* = *Power*end – *Power*start) in four frequency bands (alpha, beta, theta, and delta) after tPBM modulation with 50 mW, 150 mW, 250 mW, and Sham in Experiment 1. B) Topographic maps of powers changes in four frequency bands after tPBM modulation with 960 s, 1600 s, and Sham in Experiment 2. C) Topographic maps of powers changes in four frequency bands after tPBM modulation with 150 mW, 250 mW, and Sham in Experiment 3. The color scale in the topographic maps indicates the power changes and the black dots indicate significant electrodes (*p* < 0.05, paired t-tests, FDR-corrected).

**
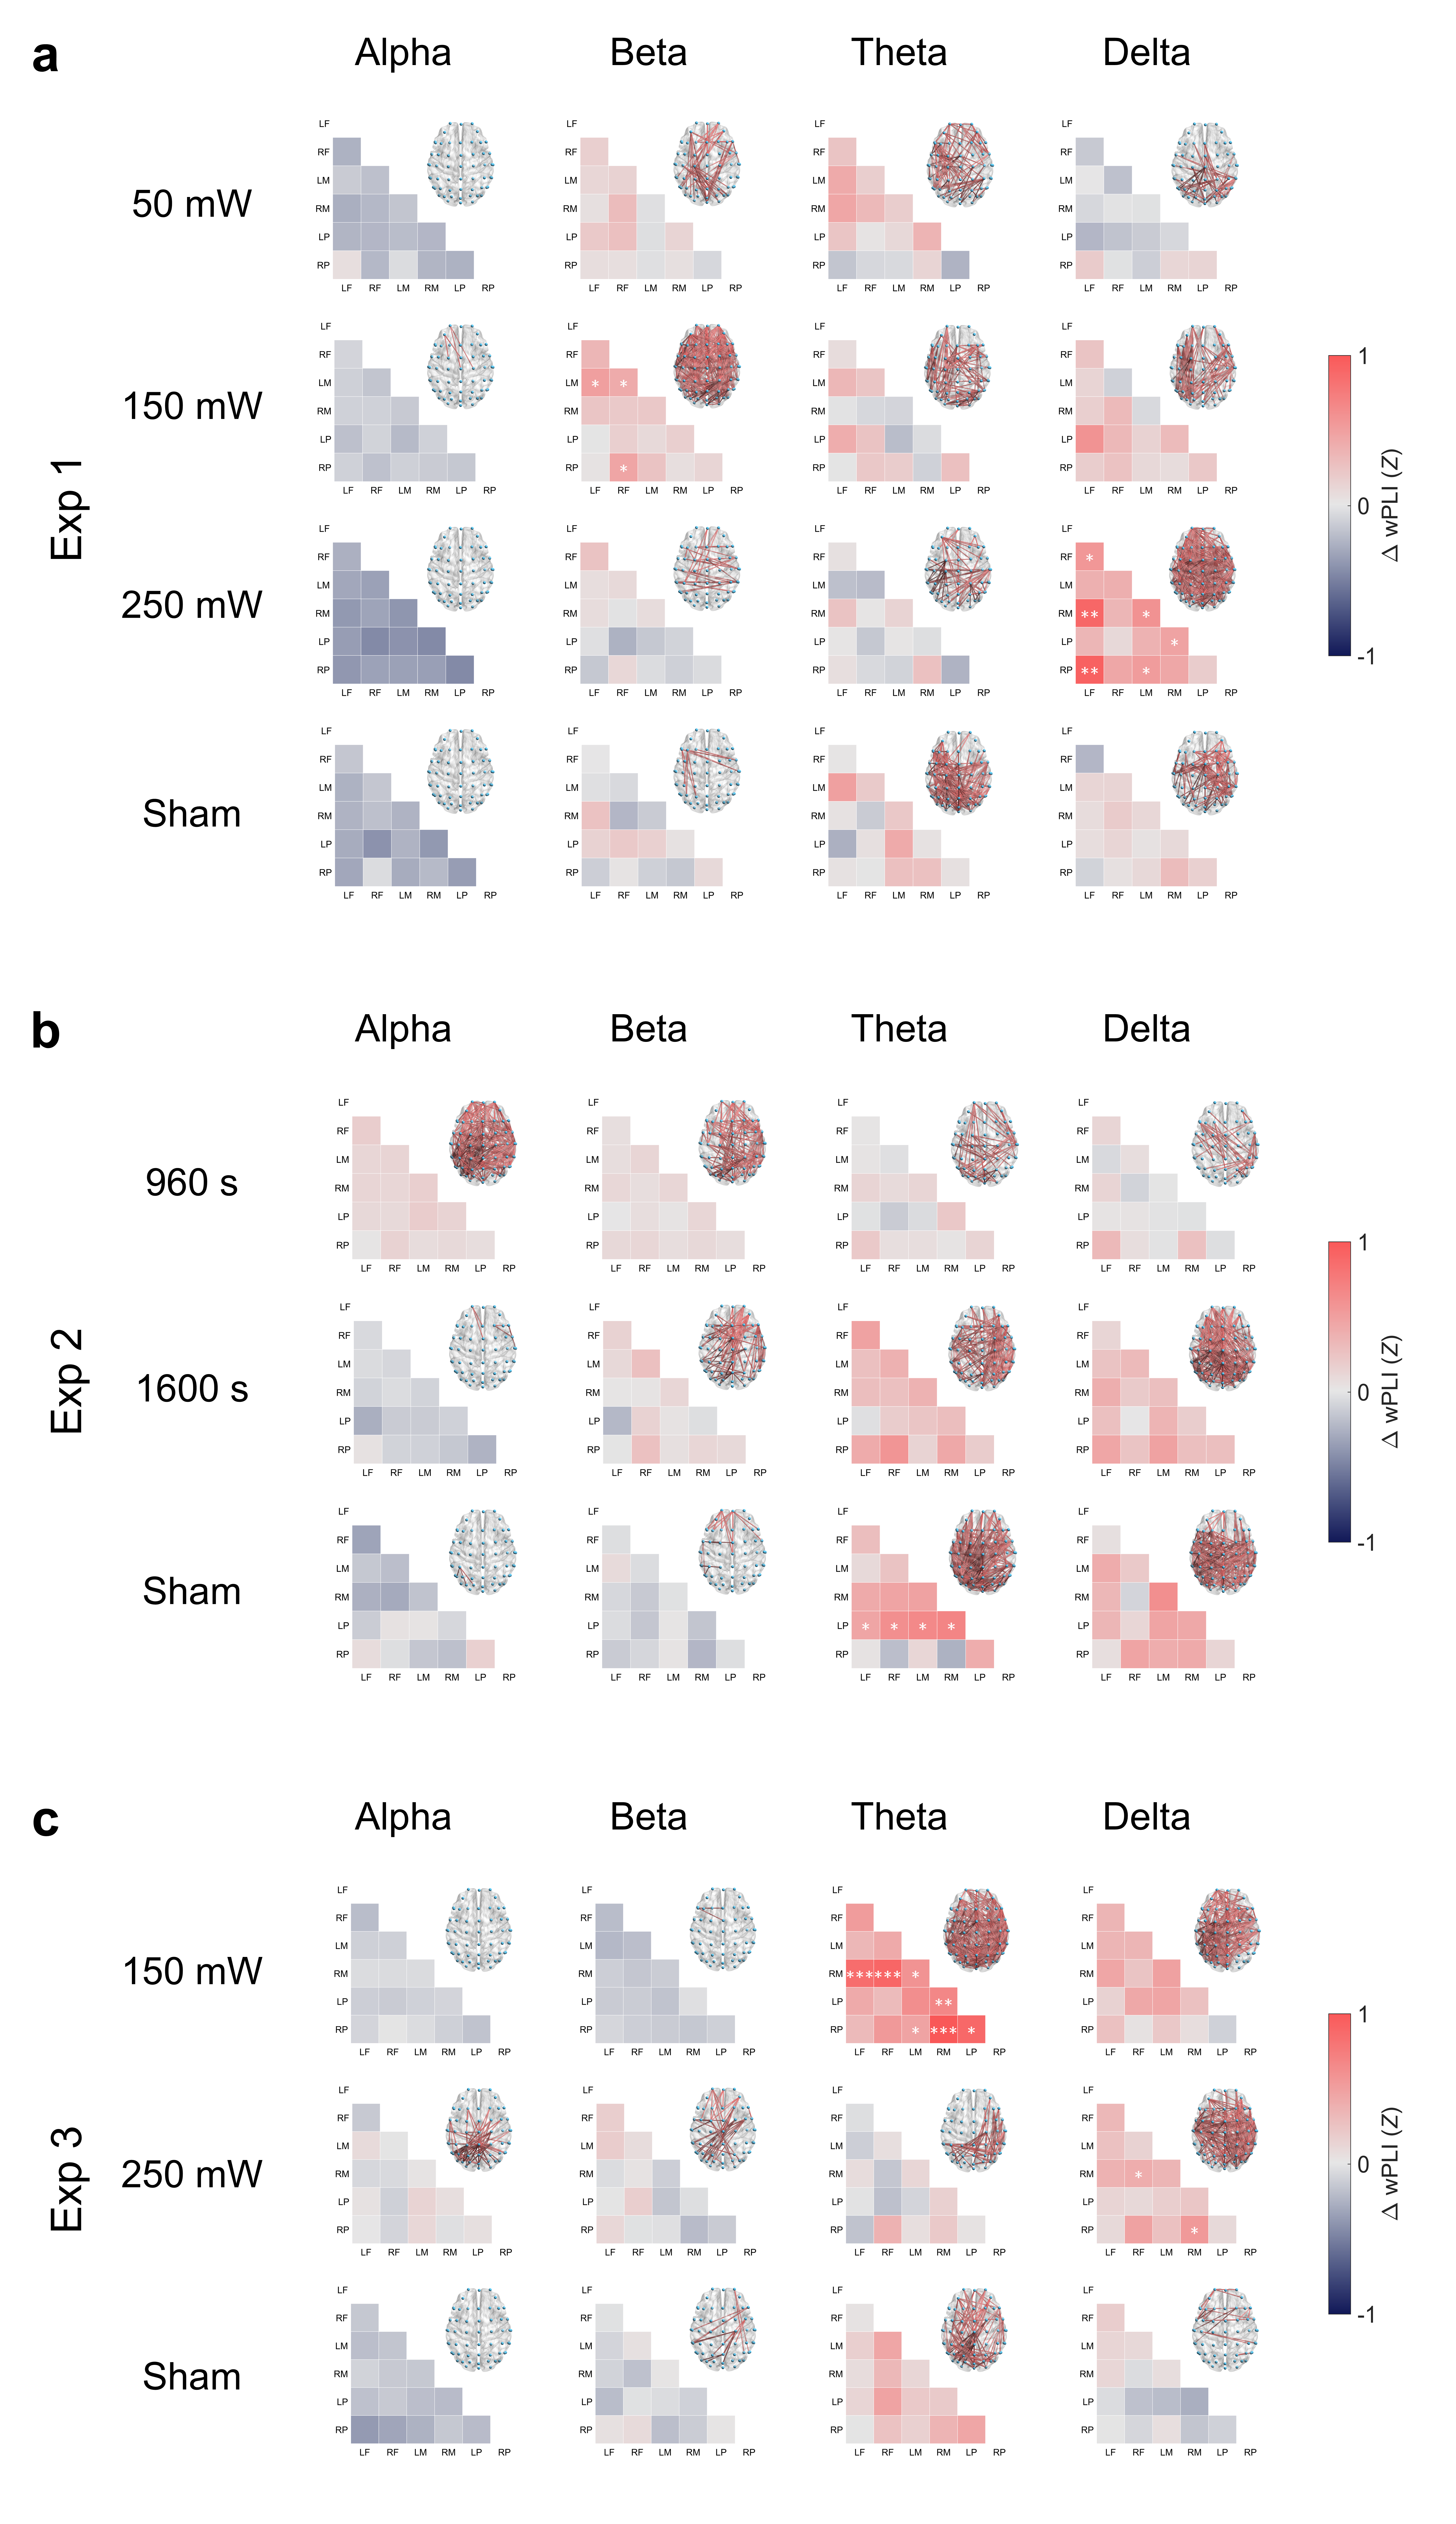
**

**Fig. S2. The functional connectivity changes in three experiments.** A) The functional connectivity changes (Δ*wPLI* = *wPLI*end – *wPLI*start) between the 6 ROIs and between all electrodes in four frequency bands (alpha, beta, theta, and delta) after tPBM modulation with 50 mW, 150 mW, 250 mW, and Sham in Experiment 1. B) The functional connectivity changes between the 6 ROIs and between all electrodes in four frequency bands after tPBM modulation with 960 s, 1600 s, and Sham in Experiment 2. C) The functional connectivity changes between the 6 ROIs and between all electrodes in four frequency bands after tPBM modulation with 150 mW, 250 mW, and Sham in Experiment 3. LF indicates the left frontal; RF indicates the right frontal; LM indicates the left middle; RM indicates the right middle; LP indicates the left parietal occipital; and RP indicates the right parietal occipital. Red lines between electrodes indicate significant electrode pairs (*p* < 0.05, paired *t*-tests, neighboring-electrode-based corrected). **p* < 0.05, ***p* < 0.01, ****p* < 0.001, paired *t*-tests, FDR-corrected.

|  | | **Power** | | | |
| --- | --- | --- | --- | --- | --- |
| **Alpha** | **Beta** | **Theta** | **Delta** |
| **Exp 1** | *50 mW* | 0/0 | 37/57 | 22/89 | 3/54 |
| *150 mW* | 0/4 | **134/302** | 24/115 | 28/91 |
| *250 mW* | 0/0 | 8/34 | 13/68 | **69/356** |
| *Sham* | 0/0 | 0/13 | 11/223 | 31/125 |
| **Exp 2** | *960 s* | 68/298 | 52/156 | 6/61 | 2/39 |
| *1600 s* | 4/7 | 60/109 | 59/177 | 37/274 |
| *Sham* | 0/3 | 8/21 | **49/272** | 24/248 |
| **Exp 3** | *150 mW* | 0/0 | 1/3 | **89/417** | 66/216 |
| *250 mW* | 2/91 | 16/39 | 12/68 | **55/281** |
| *Sham* | 0/0 | 6/17 | 28/112 | 7/21 |

**Table S1. The functional connectivity changes of four frequency bands after different tPBM modulations in all experiments.** / left indicates the electrode pairs number with a significant increase in functional connectivity between the target region (RF) and other regions after tPBM modulation; / right indicates the electrode pairs number with a significant increase in functional connectivity between all electrode pairs after tPBM modulation. Bold values indicate conditions with significant connectivity at the ROI level (*p* < 0.05, paired *t*-tests, FDR-corrected).
